# Supplementary material
Source: PubMed Central journal article supplement (PMC4870195)
Supplement: ECE3-6-3079-s001.pdf [file ECE3-6-3079-s001.pdf]

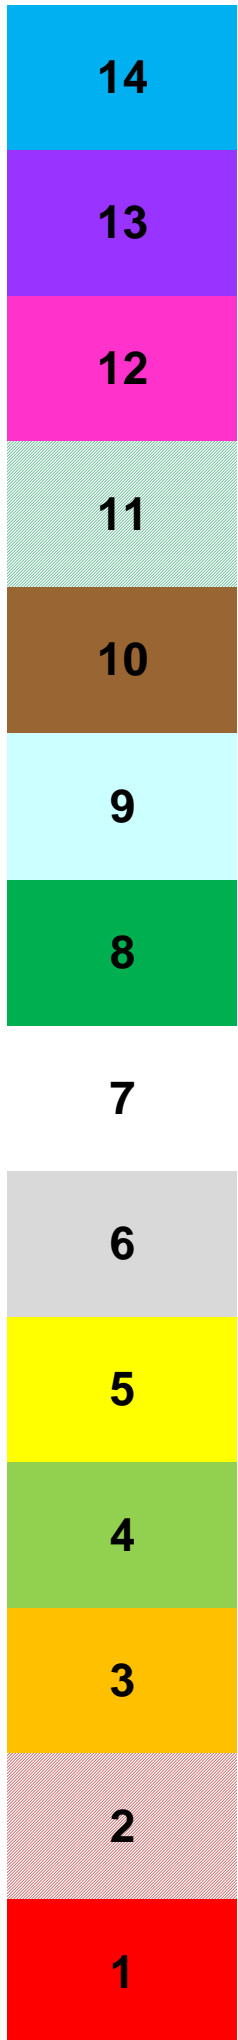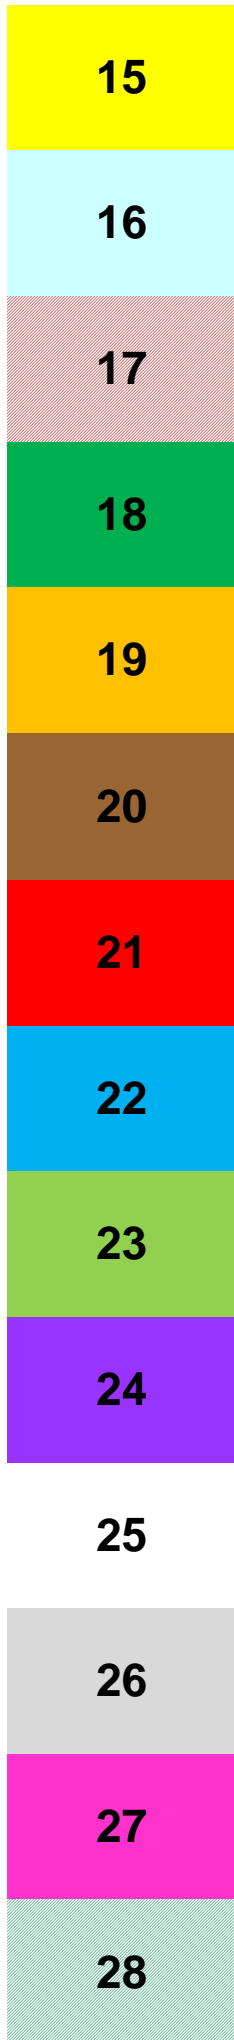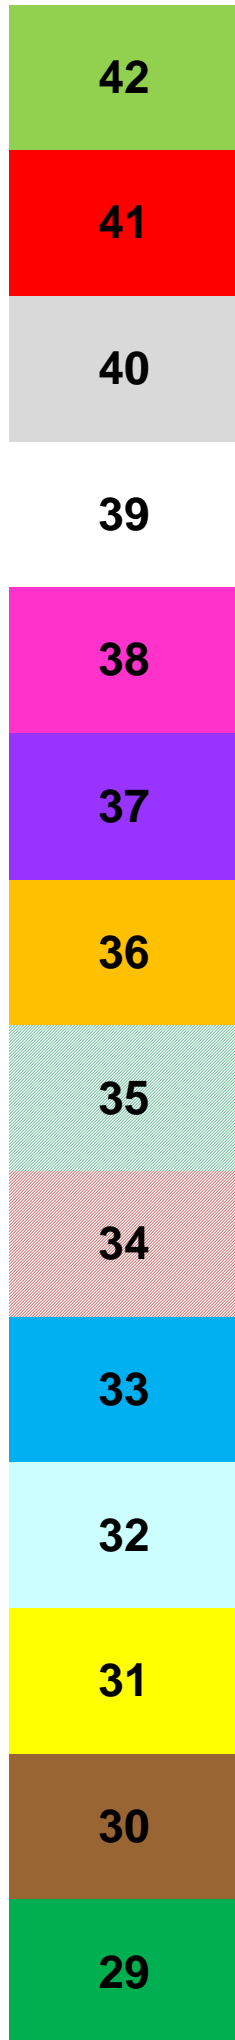

| Treatments |                                  | Abbrev |
|------------|----------------------------------|--------|
| 1          | Ryegrass standard                | RGST   |
| 2          | Ryegrass standard + legumes A    | RGLA   |
| 3          | Ryegrass standard + legumes B    | RGLB   |
| 4          | Ryegrass standard + herbs        | RGHB   |
| 5          | Ryegrass standard + grasses      | RGGR   |
| 6          | Ryegrass complex                 | RGCO   |
| 7          | Tall fescue standard             | TFST   |
| 8          | Tall fescue standard + legumes A | TFLA   |
| 9          | Tall fescue standard + legumes B | TFLB   |
| 10         | Tall fescue standard + herbs     | TFHE   |
| 11         | Tall fescue standard + grasses   | TFGR   |
| 12         | Tall fescue complex              | TFCO   |
| 13         | Special A                        | GRLH   |
| 14         | Special B                        | PGLU   |
